# Supplementary material for: Bacterial nanocellulose stimulates mesenchymal stem cell expansion and formation of stable collagen-I networks as a novel biomaterial in tissue engineering
Source: PubMed Central journal article supplement (PMC6010428; doi:10.1038/s41598-018-27760-z), 2018-06-20
Supplement: 41598_2018_27760_MOESM1_ESM.pdf [file 41598_2018_27760_MOESM1_ESM.pdf]

## Supplementary Information

# **Bacterial nanocellulose stimulates mesenchymal stem cell expansion and formation of stable collagen-I networks as a novel biomaterial in tissue engineering**

*Martin Vielreicher<sup>1,\*</sup>, Dana Kralisch<sup>2</sup>, Simon Völkl<sup>3</sup>, Fabian Sternal<sup>1</sup>, Andreas Arkudas<sup>4</sup> & Oliver Friedrich<sup>1</sup>*

<sup>1</sup> Institute of Medical Biotechnology, Department of Chemical and Biological Engineering, Friedrich-Alexander University of Erlangen-Nürnberg, Paul-Gordan-Str. 3, Erlangen, 91052 (Germany)

\* Corresponding author; E-mail: [martin.vielreicher@mbt.uni-erlangen.de](mailto:martin.vielreicher@mbt.uni-erlangen.de)

<sup>2</sup> Institute of Pharmaceutical Technology. Faculty of Biology and Pharmacy, Friedrich-Schiller-University Jena, Lessingstr. 8, Jena, 07743 (Germany)

<sup>3</sup> Department of Internal Medicine 5, Hematology and Oncology, University Hospital Erlangen, Ulmenweg 18, 91054 Erlangen (Germany)

<sup>4</sup> Department of Plastic and Hand Surgery, University Hospital Erlangen, Friedrich Alexander University of Erlangen–Nürnberg, Krankenhausstr. 12, 91054 Erlangen (Germany)

## VIDEOS

All videos presented are 3D image stacks (.avi format, 2 frames per second).

Multiphoton excitation was at  $\lambda=810$  nm, signal detection was either separated into a channel recording autofluorescence (AF,  $\lambda>460$  nm) and a channel for Second Harmonic Generation signal channel (SHG,  $\lambda=405\pm 20$  nm) or the raw signal was detected by one channel (AF and SHG unseparated). Z represents the distance between images in z direction.

**Video 1. BNC structure imaged with MPM.** Imaging into the BNC hydropolymer material (15 images, z-distance: 1  $\mu\text{m}$ ). Left sequence: punctuate AF structures. Right sequence: fibrous structure of nanocellulose shown by SHG.

**Video 2. Variations in BNC structure.** The sequences (30 images, z: 1  $\mu\text{m}$ ) reveal irregularities in BNC structure both in the AF and the SHG channel likely derived from the materials natural origin (biotechnological production).

**Video 3. Cavity structures on the BNC surface.** BNC surface imaging (MPM, z: 0.5  $\mu\text{m}$ , 23 images) focused on an islet structure with a characteristic agglomerate pattern: very intense AF signals, wavy appearance of SHG signal different to normal nanocellulose structure.

**Video 4. Cell-BNC interface.** A small distance images series (16 images, z: 0.5  $\mu\text{m}$ ) is shown uncovering the cell-material interface of MSCs attached to the surface of BNC (AF+SHG unseparated channels).

**Video 5. Collagen formation by MSCs on BNC.** A stack of 18 images (z-distance: 5  $\mu\text{m}$ ) depicts collagen-I networks within the cell multilayer (80  $\mu\text{m}$ ). Cells were grown in medium with reduced serum and elevated ascorbic acid (Std/3%FBS/aa(4x)) for a period of 15 days.

## **SUPPLEMENTARY DATASETS**

**Supplementary Dataset 1: Actin cytoskeleton staining.** MSCs at the cell-material interface labelled with phalloidin-PF546 and DAPI or phalloidin-PF546 alone and imaged using an inverted epi-fluorescence microscope. Different regions are shown.

**Supplementary Dataset 2: Flow cytometry histograms.** MSCs after 16 days on cell culture plastic versus BNC.

MSCs adherent to BNC surface - cell adhesion structures

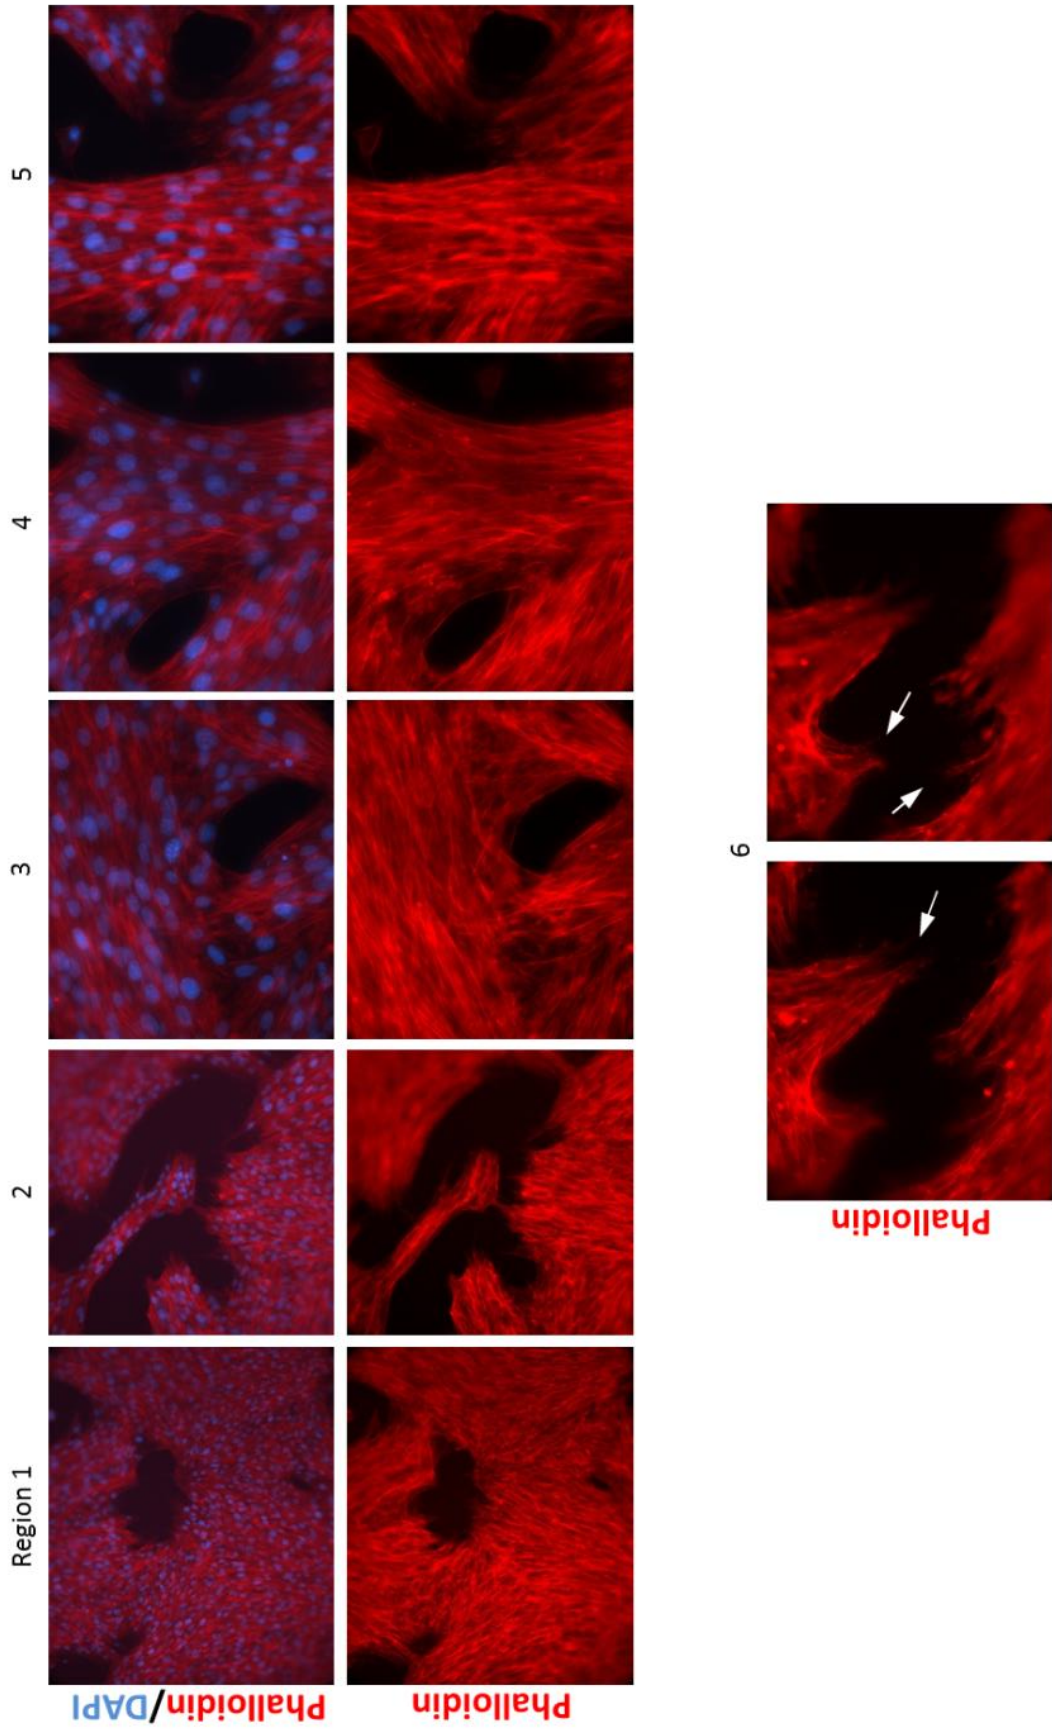

Supplementary Dataset 1: Actin cytoskeleton staining

### Flow cytometry histograms (Day 16)

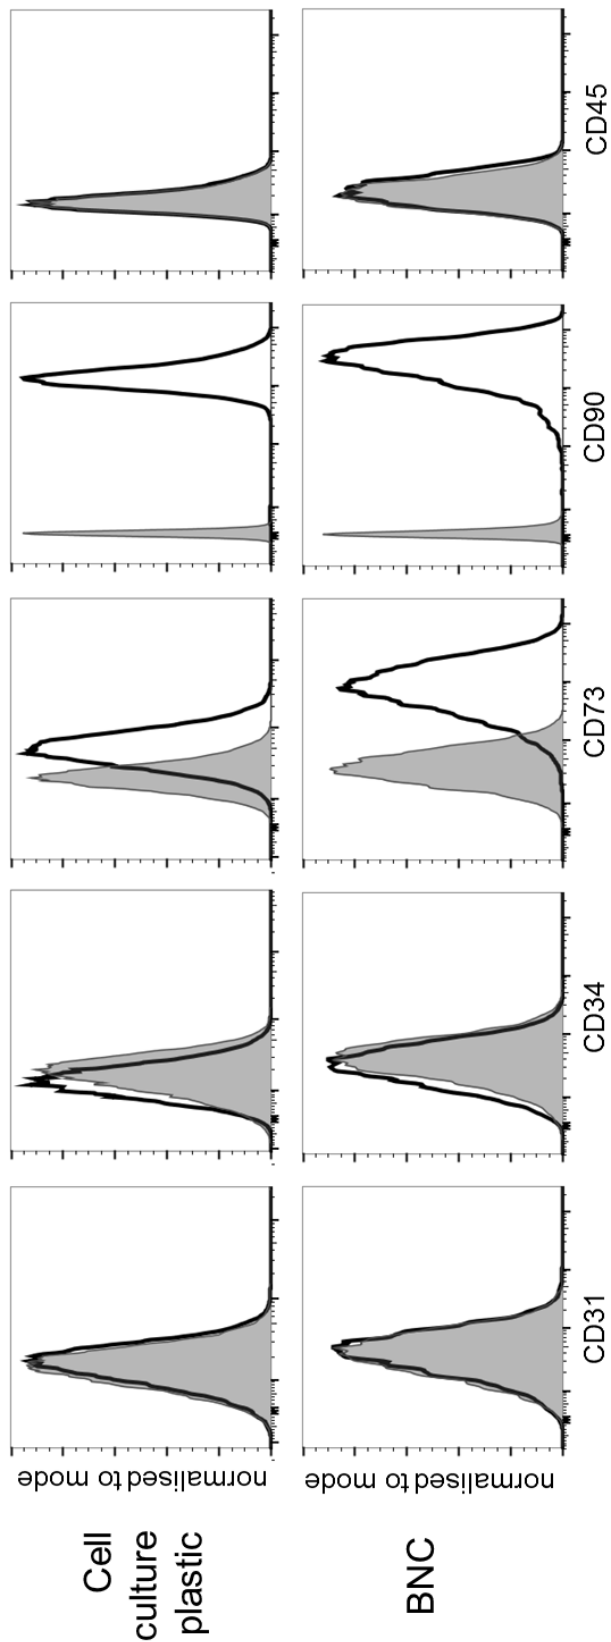

Supplementary Dataset 2: Flow cytometry histograms
